# Supplementary material
Source: Research Square preprint supplement (doi:10.21203/rs.3.rs-9383975/v1)
Supplement: Supplementary file 2 [file e5f86bf9209ac1e06aa818bf.docx]

**A Colorimetric–Fluorescent Dual-Mode Sensing Platform Based on**

**Cu NCs/Eu3+@UiO-66-(COOH)2 for the Visual and Intelligent Detection of Hydrogen Peroxide**

Yaxuan Hu, Hao Guo*, Jiawei Kou, Liping Peng, Yingfei Hui, Yu Yan, Yang Yang, Wu Yang[[1]](#footnote-0)*

Key Lab of Eco-Environments Related Polymer Materials of MOE, Key Laboratory of Water Security and Water Environment Protection in Plateau Intersection, Key Laboratory of Bioelectrochemistry & Environmental Analysis of Gansu Province, College of Chemistry and Chemical Engineering, Northwest Normal University, Gansu International Scientific and Technological Cooperation Base of Water-Retention Chemical Functional Materials, Lanzhou 730070, P R China

**S1. Chemicals**

All chemicals used in this study were of analytical grade and used as received without further purification. Zirconium chloride (ZrCl4), 1,2,4,5-benzenetetracarboxylic acid (H4btec), europium nitrate hexahydrate (Eu(NO3)3.6H2O), copper(II) sulfate (CuSO4), sodium hydroxide (NaOH), 3,3',5,5'-tetramethylbenzidine (TMB) and glutathione (GSH) were purchased from Shanghai Aladdin Chemistry Co. Ltd. (China). Ethanol was obtained from Chengdu Pubo Biotechnology Co., Ltd. (Chengdu, China). Human serum samples were collected from healthy volunteers at a local hospital and milk samples were purchased from a local supermarket.

**S2. Instrument**

X-ray diffraction (XRD) patterns of the synthesized samples were recorded using an X-ray diffractometer (Bruker, Germany) with Cu-Kα radiation (λ = 1.5418 Å). UV-Vis absorption spectra were measured on a TU-1901 double-beam UV-visible spectrophotometer (Beijing Purkinje General Instrument, Beijing, China). Fluorescence spectra were obtained using a FluoroMax-4 fluorescence spectrophotometer (Horiba, USA). Fourier transform infrared (FT-IR) spectra were collected with KBr pellets on a Digilab FTS-3000 infrared spectrometer (USA). X-ray photoelectron spectroscopy (XPS) analysis was performed on a ThermoFisher Scientific instrument (USA) to characterize the surface elemental states of the materials. Scanning electron microscopy (SEM) images were acquired using a Zeiss Ultra Plus field emission scanning electron microscope (Germany).

**S3. Supplementary figures**

**Fig. S1.** High-resolution Eu 3d XPS spectrum of Cu NCs/Eu3+@UiO-66-(COOH)2.

**Fig. S2.** High-resolution Cu 2p XPS spectrum of Cu NCs/Eu3+@UiO-66-(COOH)2.

**Fig. S3.** The N2 adsorption-desorption isotherms of UiO-66-(COOH)2.

**Fig. S4.** The N2 adsorption-desorption isotherms of Cu NCs/Eu3+@UiO-66-(COOH)2.

**Fig. S5.** Influence of pH on the fluorescence intensity ratio of Cu NCs/Eu3+@UiO-66-(COOH)2.

**Fig. S6.** Influence of NaCl concentration on the fluorescence intensity ratio of Cu NCs/Eu3+@UiO-66-(COOH)2.

**Fig. S7.** Influence of storage duration on the fluorescence intensity ratio of Cu NCs/Eu3+@UiO-66-(COOH)2.

**Fig. S8.** Time-dependent fluorescence intensity of the Cu NCs/Eu3+@UiO-66-(COOH)2 suspension in H2O2 aqueous dispersions.


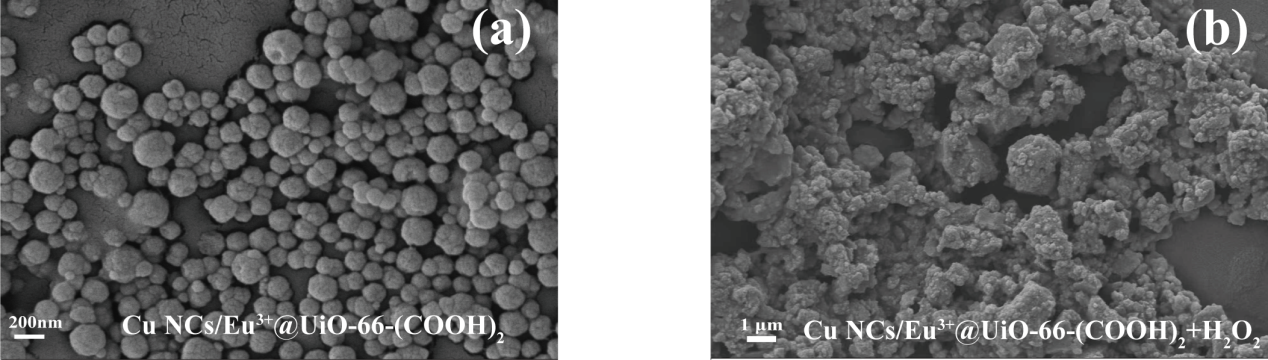


**Fig. S9.** (a) SEM image of Cu NCs/Eu3+@UiO-66-(COOH)2. (b) SEM image of Cu NCs/Eu3+@UiO-66-(COOH)2 after H2O2 treatment.

**Table S1** compares the detection performance of Cu NCs/Eu3+@UiO-66-(COOH)2 for H2O2 with those of other similar sensors previously reported in the literature.

| Materials | LOD/% | Linear range | References |
| --- | --- | --- | --- |
| Mn@Zr-MOF | 0.04 μM | 0-50 μM | [S1] |
| HBT | 1.73 μM | 0-300 μM | [S2] |
| PTZ-H-H | 0.386 μM | 0-40 μM | [S3] |
| CdSe@ZnS/AgNCs | 0.3 μM | 0.5-60 μM | [S4] |
| DN-H2O2 | 3.8 μM | 0-200 μM | [S5] |
| EuMOF@LDH | 0.036 μM | 0-300 μM | [S6] |
| Cu NCs/Eu3+@Uio-66-(COOH)2 | 0.035 μM | 0–400 μM | This work |

**References**

[S1]X. Chai, R. Zhao, M. Asif, A. Aziz, C. Dong, Y. Tang, S. Shuang, Y. Guo, Functionalization of Mn2+ with Zr-MOF for ratiometric fluorescent and smartphone-integrated colorimetric detection of hydrogen peroxide, Chem. Eng. J. 527 (2026) 171828.

[S2]H. Zhao, S. Guo, J. Guo, Y. Zhang, Detection of H2O2 by a novel fluorescent probe based on the synergy of “ESIPT + ICT”, Talanta. 293 (2025) 128062.

[S3]Q. He, S. Zang, Y. Zeng, B. Wang, X. Song, A bifunctional fluorescent probe for dual-channel detection of H2O2 and HOCl in living cells, Spectrochim. Acta, Part A. 328 (2025) 125464.

[S4]Z. Zhou, L. Yang, L. Huang, Y. Liao, Y. Liu, Q. Xiao, A novel fluorescent probe for H2O2 detection based on CdSe@ZnS quantum dots/Ag nanocluster hybrid, Anal. Chim. Acta. 1106 (2020) 176.

[S5]Y. Zhang, G. Ma, L. Li, X. Li, M. Wang, Ruiyuan Liu, Jinqing Qu, A novel fluorescent probe for the detection of H2O2 in multiple food matrices and biological samples, Food Chem. 489 (2025) 144998.

[S6]L. Zhao, Q. Gu, R. Qin, Z. Ding, S. Liang, H. Jin, A novel MOF@LDH nanoflower composite for fluorescent/electrochemical dual-mode detection of H2O2, Inorganic Chemistry Communications, Inorg. Chem. Commun. 183 (2026) 115720.

1. * Correspondence authors. Email: [xbsfda123@126.com](mailto:xbsfda123@126.com) (W. Yang) and [haoguo12@126.com](mailto:haoguo12@126.com) (H. Guo). [↑](#footnote-ref-0)
