# Supplementary material
Source: Research Square preprint supplement (doi:10.21203/rs.3.rs-9383975/v1)

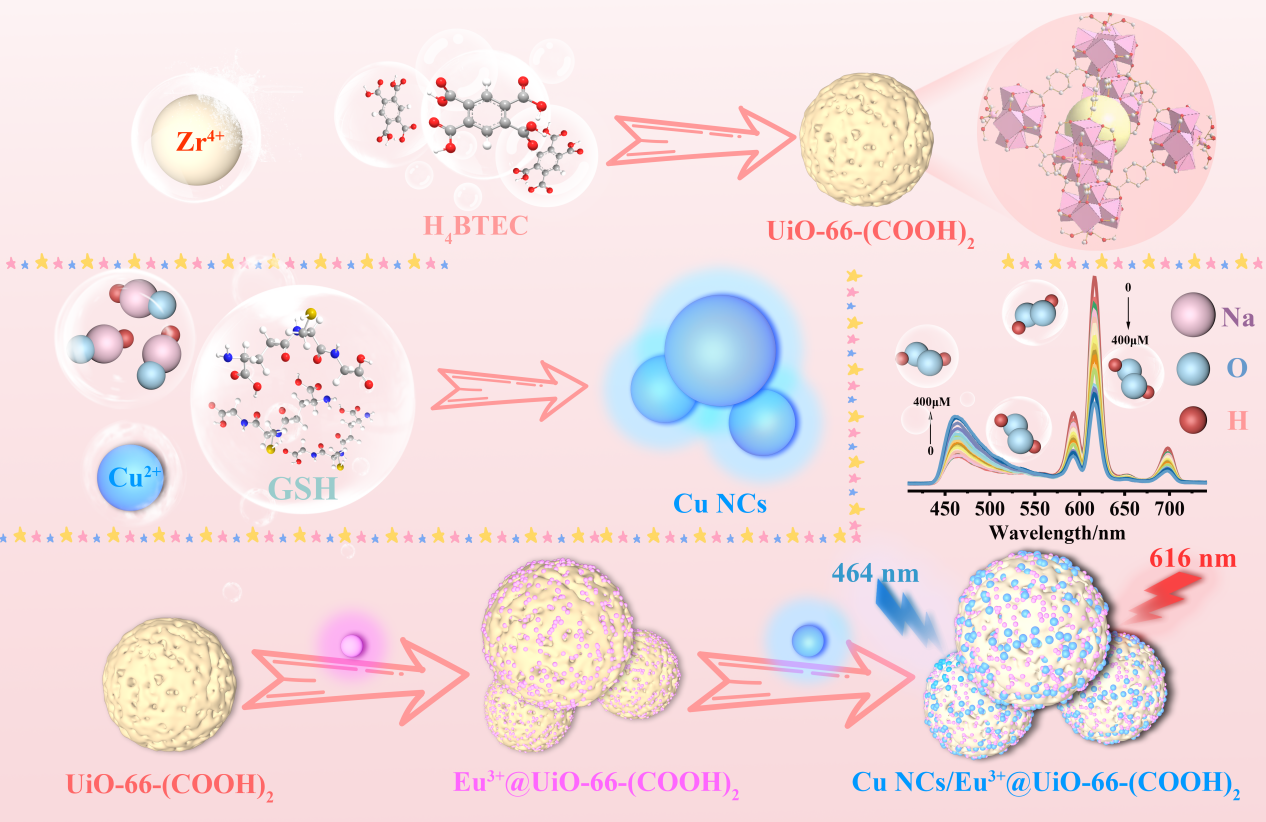


**Scheme 1**. Synthesis of Cu NCs/Eu3+@UiO-66-(COOH)2.

Supplement: Supplementary file 1 [file 958bc8df2eff240331d5f1f0.docx]
